# Supplementary material
Source: publisher figshare collection journal article supplement (https://tandf.figshare.com/articles/dataset/_/12032757)

## Estimating the level of disease risk and biosecurity on commercial poultry farms in New Zealand

SS Greening <sup>\*§</sup>, K Mulqueen<sup>†</sup>, TG Rawdon<sup>‡</sup>, NP French<sup>#</sup> and MC Gates<sup>\*</sup>

<sup>\*</sup> Epicentre, Massey University School of Veterinary Science, Palmerston North 4442, New Zealand

<sup>†</sup> Poultry Industry Association of New Zealand (PIANZ), 96 Carlton Gore Road, Auckland 1023, New Zealand

<sup>‡</sup> Diagnostic and Surveillance Services Directorate, Ministry for Primary Industries, 66 Ward Street, Upper Hutt 5140, New Zealand

<sup>#</sup> New Zealand Food Safety Science and Research Centre, Hopkirk Research Institute, Massey University, Palmerston North 4442, New Zealand

<sup>§</sup> Author for correspondence. Email: S.Greening@massey.ac.nz

**Supplementary Table 1. The breakdown of 120 producers in the New Zealand commercial poultry industry, including 33 layer enterprises, 57 broiler enterprises, 24 breeder enterprises and 6 enterprises representing either duck, turkey or pullet operations, and the number of neighbouring commercial poultry farms within a 5km radius of their production premises.**

| Number of neighbouring farms | Number of farms (% within the sector) |                      |                      |                                       |
|------------------------------|---------------------------------------|----------------------|----------------------|---------------------------------------|
|                              | Layers <sup>a</sup><br>(n = 33)       | Broilers<br>(n = 57) | Breeders<br>(n = 24) | Other poultry <sup>b</sup><br>(n = 6) |
| 1                            | 18 (54.5)                             | 6 (10.5)             | 2 (8.3)              | 3 (50.0)                              |
| 2                            | 6 (18.2)                              | 6 (10.5)             | 8 (33.3)             | 1 (16.7)                              |
| 3                            | 4 (12.1)                              | 6 (10.5)             | 0 (0.0)              | 0 (0.0)                               |
| 4                            | 1 (3.3)                               | 7 (12.3)             | 3 (12.5)             | 0 (0.0)                               |
| 5                            | 0 (0.0)                               | 5 (8.8)              | 2 (8.3)              | 0 (0.0)                               |
| 6                            | 1 (3.3)                               | 3 (5.3)              | 3 (12.5)             | 0 (0.0)                               |
| 7                            | 0 (0.0)                               | 2 (3.5)              | 5 (20.8)             | 2 (33.3)                              |
| ≥ 8                          | 3 (9.9)                               | 22 (38.6)            | 1 (4.2)              | 0 (0.0)                               |

<sup>a</sup> includes mixed pullet and layer enterprises, <sup>b</sup> includes duck, pullet and turkey enterprises

**Supplementary Table 2. Water source and treatment on 120 producers in the New Zealand commercial poultry industry, including 33 layer enterprises, 57 broiler enterprises, 24 breeder enterprises and 6 enterprises representing either duck, turkey or pullet operations.**

|              |                       | Number of farms (% within the sector) |                      |                      |                                       |
|--------------|-----------------------|---------------------------------------|----------------------|----------------------|---------------------------------------|
|              |                       | Layers <sup>a</sup><br>(n = 33)       | Broilers<br>(n = 57) | Breeders<br>(n = 24) | Other poultry <sup>b</sup><br>(n = 6) |
| Water source | Town supply           | 6 (18.2)                              | 10 (17.5)            | 18 (75.0)            | 3 (50.0)                              |
|              | River/ stream/ spring | 3 (9.1)                               | 4 (7.0)              | 0 (0.0)              | 0 (0.0)                               |
|              | Bore                  | 16 (48.5)                             | 43 (75.4)            | 6 (25.0)             | 3 (50.0)                              |
|              | Rain/ roof water      | 8 (24.2)                              | 0 (0.0)              | 0 (0.0)              | 0 (0.0)                               |
| Treatment    | No treatment          | 16 (48.5)                             | 3 (5.3)              | 4 (16.7)             | 5 (83.3)                              |
|              | Chlorine Dioxide      | 7 (21.2)                              | 52 (91.2)            | 9 (37.5)             | 0 (0.0)                               |
|              | Ultraviolet           | 8 (24.2)                              | 0 (0.0)              | 0 (0.0)              | 0 (0.0)                               |
|              | Sodium Hypochlorite   | 0 (0.0)                               | 2 (3.5)              | 11 (45.8)            | 0 (0.0)                               |
|              | Filtration            | 2 (6.1)                               | 0 (0.0)              | 0 (0.0)              | 0 (0.0)                               |
|              | Citric acid mix       | 0 (0.0)                               | 0 (0.0)              | 0 (0.0)              | 1 (16.7)                              |

<sup>a</sup> includes mixed pullet and layer enterprises, <sup>b</sup> includes duck, pullet and turkey enterprises

**Supplementary Table 3. Litter management on 120 producers in the New Zealand commercial poultry industry, including 33 layer enterprises, 57 broiler enterprises, 24 breeder enterprises and 6 enterprises representing either duck, turkey or pullet operations.**

|                              |               | Number of farms (% within the sector) |                      |                      |                                       |
|------------------------------|---------------|---------------------------------------|----------------------|----------------------|---------------------------------------|
|                              |               | Layers <sup>a</sup><br>(n = 33)       | Broilers<br>(n = 57) | Breeders<br>(n = 24) | Other poultry <sup>b</sup><br>(n = 6) |
| Litter type                  | No litter     | 15 (45.5)                             | 6 (10.5)             | 2 (8.3)              | 2 (33.3)                              |
|                              | Sawdust       | 5 (15.2)                              | 0 (0.0)              | 0 (0.0)              | 0 (0.0)                               |
|                              | Wood shavings | 10 (30.3)                             | 51 (89.5)            | 0 (0.0)              | 0 (0.0)                               |
|                              | Other         | 3 (9.09)                              | 0 (0.0)              | 22 (91.7)            | 4 (66.7)                              |
| Litter shed                  | Present       | 10 (30.3)                             | 4 (7.0)              | 2 (8.3)              | 4 (66.7)                              |
|                              | Absent        | 23 (69.7)                             | 53 (93.0)            | 22 (91.7)            | 2 (33.3)                              |
| Regularity of cleaning sheds | Partially     | 3 (9.09)                              | 0 (0.0)              | 0 (0.0)              | 2 (33.3)                              |
|                              | Fully         | 23 (69.7)                             | 57 (100)             | 23 (95.8)            | 4 (66.7)                              |
|                              | N/A           | 7 (21.2)                              | 0 (0.0)              | 1 (4.2)              | 0 (0.0)                               |
| Disinfectant used            | None          | 14 (42.4)                             | 19 (33.3)            | 3 (12.5)             | 3 (50.0)                              |
|                              | Techsan       | 0 (0.0)                               | 4 (7.0)              | 3 (12.5)             | 1 (16.7)                              |
|                              | Glutasan      | 0 (0.0)                               | 4 (7.0)              | 11 (45.8)            | 0 (0.0)                               |
|                              | Enviro-san    | 2 (6.06)                              | 5 (8.8)              | 0 (0.0)              | 0 (0.0)                               |
|                              | Virkon        | 9 (27.3)                              | 8 (14.0)             | 0 (0.0)              | 1 (16.7)                              |
|                              | Other         | 8 (24.2)                              | 17 (29.8)            | 7 (29.2)             | 1 (16.7)                              |
| Litter moisture              | Too dry       | 2 (6.06)                              | 1 (1.8)              | 0 (0.0)              | 0 (0.0)                               |
|                              | About right   | 24 (72.7)                             | 56 (98.2)            | 23 (95.8)            | 6 (100)                               |
|                              | Too wet       | 0 (0.0)                               | 0 (0.0)              | 0 (0.0)              | 0 (0.0)                               |
|                              | N/A           | 7 (21.2)                              | 0 (0.0)              | 1 (4.2)              | 0 (0.0)                               |
| Litter treatment             | No            | 24 (72.7)                             | 57 (100)             | 23 (95.8)            | 6 (100)                               |
|                              | Yes           | 2 (6.06)                              | 0 (0.0)              | 0 (0.0)              | 0 (0.0)                               |
|                              | N/A           | 7 (21.2)                              | 0 (0.0)              | 1 (4.2)              | 0 (0.0)                               |

<sup>a</sup> includes mixed pullet and layer enterprises, <sup>b</sup> includes duck, pullet and turkey enterprises

**Supplementary Table 4. Reported sightings of wild birds, including six common species and waterfowl, on 120 producers in the New Zealand commercial poultry industry, including 33 layer enterprises, 57 broiler enterprises, 24 breeder enterprises and 6 enterprises representing either duck, turkey or pullet operations.**

|                                                                    |            | Number of farms (% within the sector) |                      |                      |                                       |
|--------------------------------------------------------------------|------------|---------------------------------------|----------------------|----------------------|---------------------------------------|
|                                                                    |            | Layers <sup>a</sup><br>(n = 33)       | Broilers<br>(n = 57) | Breeders<br>(n = 24) | Other poultry <sup>b</sup><br>(n = 6) |
| <b>In the <u>same area</u> as<br/>poultry (%)</b>                  | Wild birds | 21 (63.6)                             | 20 (35.1)            | 1 (4.2)              | 3 (50.0)                              |
|                                                                    | Waterfowl  | 3 (9.1)                               | 5 (8.8)              | 1 (4.2)              | 0 (0.0)                               |
|                                                                    | Sparrows   | 21 (63.6)                             | 24 (42.1)            | 0 (0.0)              | 3 (50.0)                              |
|                                                                    | Starlings  | 15 (45.5)                             | 14 (24.6)            | 0 (0.0)              | 3 (50.0)                              |
|                                                                    | Sea gulls  | 4 (12.1)                              | 5 (8.8)              | 0 (0.0)              | 0 (0.0)                               |
|                                                                    | Duck       | 3 (9.1)                               | 7 (12.3)             | 1 (4.2)              | 1 (16.7)                              |
|                                                                    | Other      | 6 (18.2)                              | 8 (14.0)             | 8 (33.3)             | 2 (33.3)                              |
| <b>On <u>ponds or</u><br/><u>waterways</u> on the<br/>farm (%)</b> | Wild birds | 7 (21.2)                              | 14 (24.6)            | 1 (4.2)              | 3 (50.0)                              |
|                                                                    | Waterfowl  | 7 (21.2)                              | 17 (29.8)            | 6 (25.0)             | 3 (50.0)                              |
|                                                                    | Sparrows   | 2 (6.1)                               | 10 (17.5)            | 0 (0.0)              | 1 (16.7)                              |
|                                                                    | Starlings  | 3 (9.1)                               | 7 (12.3)             | 0 (0.0)              | 1 (16.7)                              |
|                                                                    | Sea gulls  | 3 (9.1)                               | 1 (1.8)              | 0 (0.0)              | 0 (0.0)                               |
|                                                                    | Duck       | 7 (21.2)                              | 15 (26.3)            | 1 (4.2)              | 1 (16.7)                              |
|                                                                    | Other      | 1 (3.0)                               | 5 (8.8)              | 1 (4.2)              | 1 (16.7)                              |

<sup>a1</sup> includes mixed pullet and layer enterprises, <sup>b</sup> includes duck, pullet and turkey enterprises

**Supplementary Table 5. Equipment shared by 120 producers in the New Zealand commercial poultry industry and the proportion cleaning them upon return.**

|                    | <b>Number of study farms<br/>sharing equipment (n<br/>= 120) (% cleaned)</b> | <b>% of farms that shared<br/>but <u>did not</u> clean<br/>equipment</b> | <b>Number of study farms<br/><u>not</u> sharing equipment<br/>(n = 120) (%)</b> |
|--------------------|------------------------------------------------------------------------------|--------------------------------------------------------------------------|---------------------------------------------------------------------------------|
| Vehicles           | 39 (53.8, 21/39)                                                             | 46.2 (18/39)                                                             | 81 (67.5)                                                                       |
| Gates              | 21 (33.3, 7/21)                                                              | 66.7 (14/21)                                                             | 99 (82.5)                                                                       |
| Lawn equipment     | 33 (51.5, 17/33)                                                             | 48.5 (16/33)                                                             | 87 (72.5)                                                                       |
| Sprayers           | 47 (63.8, 30/47)                                                             | 36.2 (17/47)                                                             | 73 (60.8)                                                                       |
| Skid steer loaders | 53 (67.9, 36/53)                                                             | 32.1 (17/53)                                                             | 67 (55.8)                                                                       |
| Other equipment    | 43 (65.1, 28/43)                                                             | 34.9 (15/43)                                                             | 77 (64.1)                                                                       |

**Supplementary Table 6. Frequency of implementing seven common biosecurity measures amongst 120 producers in the New Zealand commercial poultry industry including 33 layer enterprises, 57 broiler enterprises, 24 breeder enterprises and 6 enterprises representing either duck, turkey or pullet operations.**

|                                |           | Number of farms (%)             |                      |                      |                                       |
|--------------------------------|-----------|---------------------------------|----------------------|----------------------|---------------------------------------|
|                                |           | Layers <sup>a</sup><br>(n = 33) | Broilers<br>(n = 57) | Breeders<br>(n = 24) | Other poultry <sup>b</sup><br>(n = 6) |
| <b>Vehicle disinfection</b>    | Never     | 30 (90.9)                       | 20 (35.1)            | 4 (16.7)             | 2 (33.3)                              |
|                                | Rarely    | 1 (3.0)                         | 5 (8.8)              | 8 (33.3)             | 1 (16.7)                              |
|                                | Sometimes | 2 (6.1)                         | 10 (17.5)            | 1 (4.2)              | 0 (0.0)                               |
|                                | Often     | 0 (0.0)                         | 8 (14.0)             | 0 (0.0)              | 1 (16.7)                              |
|                                | Always    | 0 (0.0)                         | 14 (24.6)            | 11 (45.8)            | 2 (33.3)                              |
| <b>Clean coveralls</b>         | Never     | 20 (60.6)                       | 18 (31.6)            | 1 (4.2)              | 6 (100)                               |
|                                | Rarely    | 2 (6.1)                         | 3 (5.3)              | 0 (0.0)              | 0 (0.0)                               |
|                                | Sometimes | 4 (12.1)                        | 15 (26.3)            | 1 (4.2)              | 0 (0.0)                               |
|                                | Often     | 3 (9.1)                         | 4 (7.0)              | 0 (0.0)              | 0 (0.0)                               |
|                                | Always    | 4 (12.1)                        | 17 (29.8)            | 22 (91.7)            | 0 (0.0)                               |
| <b>Boot covers</b>             | Never     | 18 (54.5)                       | 1 (1.8)              | 1 (4.2)              | 1 (16.7)                              |
|                                | Rarely    | 1 (3.0)                         | 0 (0.0)              | 0 (0.0)              | 0 (0.0)                               |
|                                | Sometimes | 3 (9.1)                         | 2 (3.5)              | 0 (0.0)              | 0 (0.0)                               |
|                                | Often     | 2 (6.1)                         | 0 (0.0)              | 0 (0.0)              | 3 (50.0)                              |
|                                | Always    | 9 (27.3)                        | 54 (94.7)            | 23 (95.8)            | 2 (33.3)                              |
| <b>Footbaths</b>               | Never     | 21 (63.6)                       | 10 (17.5)            | 0 (0.0)              | 0 (0.0)                               |
|                                | Rarely    | 0 (0.0)                         | 2 (3.5)              | 11 (45.8)            | 0 (0.0)                               |
|                                | Sometimes | 2 (6.1)                         | 4 (7.0)              | 0 (0.0)              | 0 (0.0)                               |
|                                | Often     | 2 (6.1)                         | 2 (3.5)              | 0 (0.0)              | 0 (0.0)                               |
|                                | Always    | 8 (24.2)                        | 39 (68.4)            | 13 (54.2)            | 6 (100)                               |
| <b>Rodent bait stations</b>    | Never     | 1 (3.0)                         | 0 (0.0)              | 0 (0.0)              | 0 (0.0)                               |
|                                | Rarely    | 0 (0.0)                         | 0 (0.0)              | 0 (0.0)              | 0 (0.0)                               |
|                                | Sometimes | 1 (3.0)                         | 0 (0.0)              | 0 (0.0)              | 0 (0.0)                               |
|                                | Often     | 1 (3.0)                         | 2 (3.5)              | 0 (0.0)              | 0 (0.0)                               |
|                                | Always    | 30 (90.9)                       | 55 (96.5)            | 24 (100)             | 6 (100)                               |
| <b>Bird-proofed housing</b>    | Never     | 7 (21.2)                        | 1 (1.8)              | 0 (0.0)              | 0 (0.0)                               |
|                                | Rarely    | 3 (9.1)                         | 0 (0.0)              | 0 (0.0)              | 0 (0.0)                               |
|                                | Sometimes | 1 (3.0)                         | 4 (7.0)              | 0 (0.0)              | 0 (0.0)                               |
|                                | Often     | 2 (6.1)                         | 0 (0.0)              | 0 (0.0)              | 0 (0.0)                               |
|                                | Always    | 20 (60.6)                       | 52 (91.2)            | 24 (100)             | 6 (100)                               |
| <b>Bird-proofed feed store</b> | Never     | 3 (9.1)                         | 0 (0.0)              | 1 (4.2)              | 0 (0.0)                               |
|                                | Rarely    | 0 (0.0)                         | 0 (0.0)              | 0 (0.0)              | 0 (0.0)                               |
|                                | Sometimes | 2 (6.1)                         | 0 (0.0)              | 0 (0.0)              | 0 (0.0)                               |
|                                | Often     | 1 (3.0)                         | 1 (1.8)              | 0 (0.0)              | 0 (0.0)                               |
|                                | Always    | 27 (81.8)                       | 56 (98.2)            | 23 (95.8)            | 6 (100)                               |

<sup>a</sup> includes mixed pullet and layer enterprises, <sup>b</sup> includes duck, pullet and turkey enterprises

**Supplementary Figure 1. Scatter plots showing the relationship between the estimated biosecurity score, calculated from the reported frequency of implementing seven common biosecurity practices, and the estimated disease contact risk score across (a) 57 broiler enterprises, (b) 33 layer enterprises, (c) 24 breeder enterprises and (d) 6 enterprises representing either duck, turkey or pullet operations in the New Zealand commercial poultry industry. The Pearson's correlation coefficient (PCC) and 95% confidence intervals were -0.03 (-0.29, 0.23), -0.02 (-0.11, 0.33), 0.66 (0.34, 0.84), and -0.01 (-0.82, 0.81) for plots (a), (b), (c) and (d) respectively ( $P$ -value <0.01).**

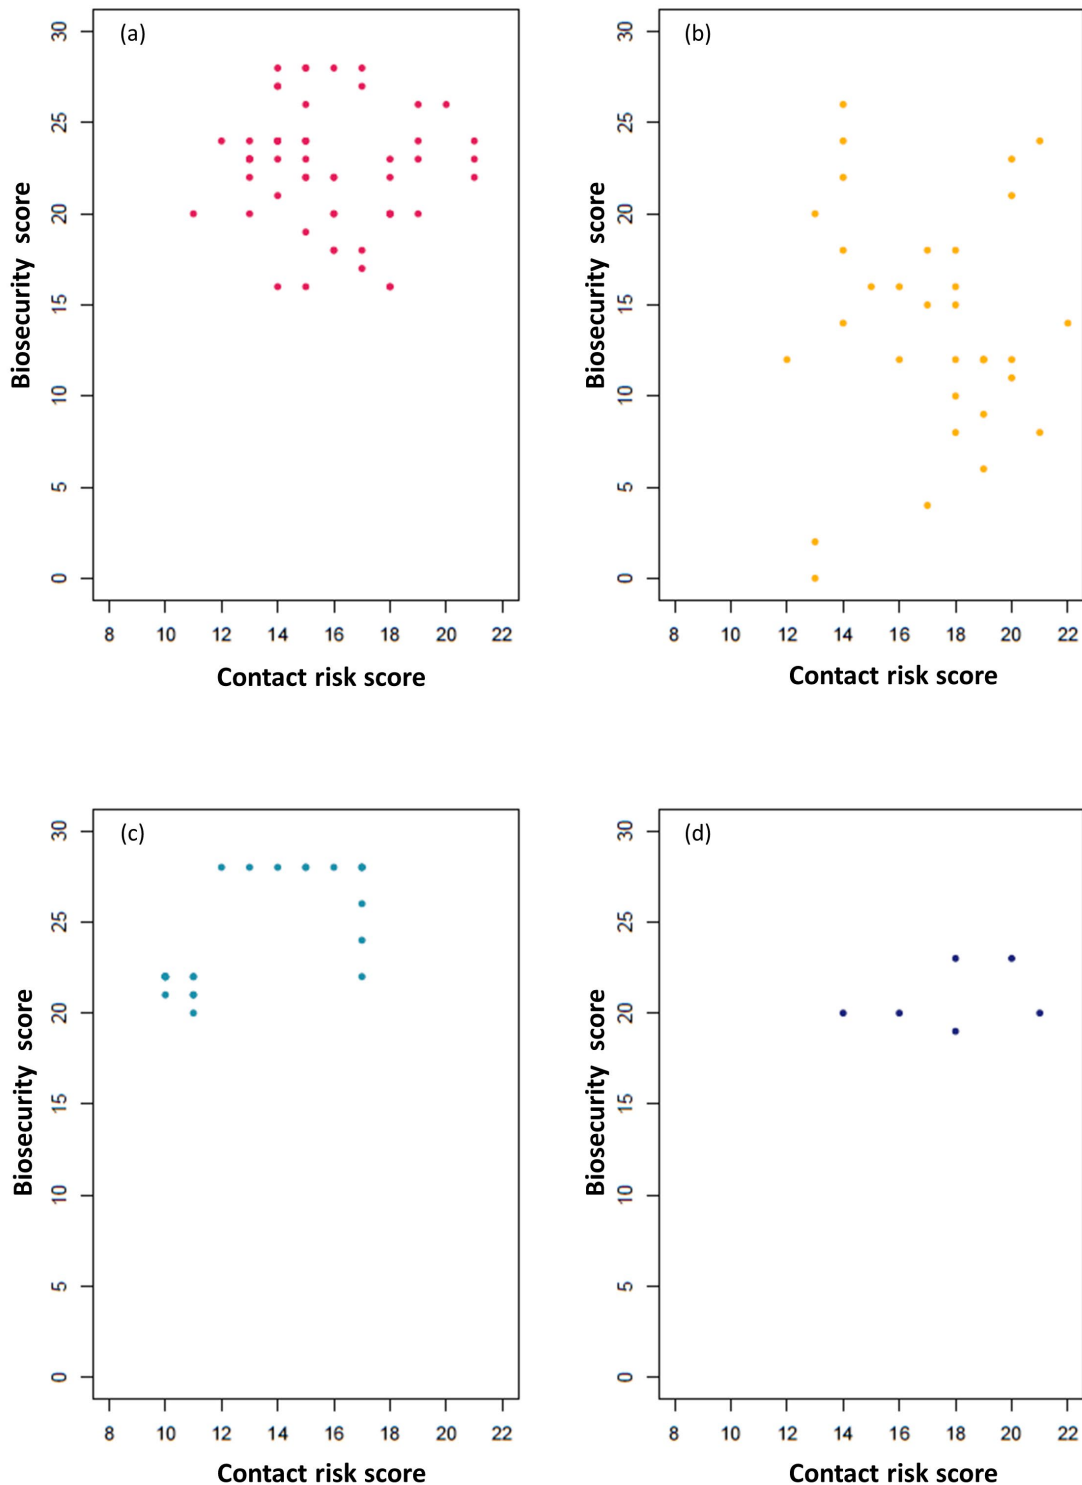

Supplement: Supplementary file 1 [file 1 › tnzv_a_1746208_sm4326.pdf]
