# Supplementary material
Source: publisher figshare collection journal article supplement (https://tandf.figshare.com/articles/dataset/_/12032757)

---

## **Estimating the level of disease risk and biosecurity on commercial poultry farms in New Zealand**

**SS Greening \*<sup>§</sup>, K Mulqueen<sup>†</sup>, TG Rawdon<sup>‡</sup>, NP French<sup>#</sup> and MC Gates<sup>\*</sup>**

\* Epicentre, Massey University School of Veterinary Science, Palmerston North 4442, New Zealand

† Poultry Industry Association of New Zealand (PIANZ), 96 Carlton Gore Road, Auckland 1023, New Zealand

‡ Diagnostic and Surveillance Services Directorate, Ministry for Primary Industries, 66 Ward Street, Upper Hutt 5140, New Zealand

# New Zealand Food Safety Science and Research Centre, Hopkirk Research Institute, Massey University, Palmerston North 4442, New Zealand

§ Author for correspondence. Email: S.Greening@massey.ac.nz

---

### **Supplementary Information 1. Questionnaire used in a survey of poultry producers regarding farm disease risk contacts and biosecurity practices.**

---

# CONTACT STRUCTURES IN THE NEW ZEALAND COMMERCIAL POULTRY INDUSTRY

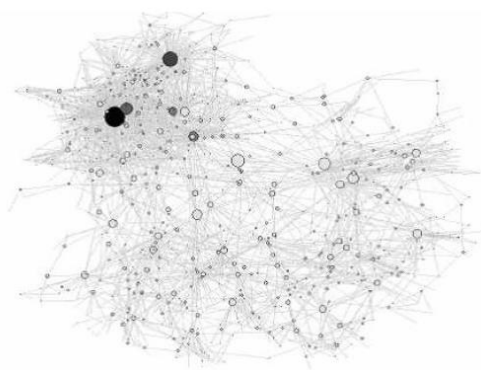

Dear Producer,

We are conducting a survey to describe the extent and nature of contacts between commercial farms in the New Zealand poultry industry. Specifically, we are interested in contacts made through the sale of feed, transportation of live poultry and poultry products, regular visits made by industry personnel, and the movement of waste products such as manure, litter and dead birds.

## Why are we conducting this survey?

Contacts are an important means by which diseases can spread from farm to farm. There have been many changes in the poultry industry since the last contact survey was conducted in 2006. We want to know how these changes have impacted your risk of getting disease from other farms and how we can better help to protect your livelihoods.

## How will we use the survey information?

We will use this data to reconstruct the industry contact network and develop simulation models to predict how diseases like Avian Influenza and Campylobacter may spread.

## Confidentiality

All information will be treated as strictly confidential and no information will be used in any way that could reasonably be expected to identify individual persons, practices or organisations.

The study results will only be useful if **all** producers take part. We greatly appreciate your valuable time in completing the survey questions.

Sincerely,

Dr. Carolyn Gates  
Massey University

## Thank You!

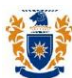

Massey University

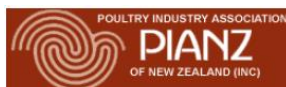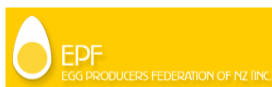

Ministry for Primary Industries  
Manatū Ahu Matua

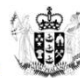

This research study is being conducted by the EpiCentre at Massey University and is fully endorsed by the Poultry Industry Association of New Zealand (PIANZ) and the Egg Producers Federation of New Zealand (EPF) with support from the Ministry for Primary Industries.

## INSTRUCTIONS

### Please read carefully before beginning the survey

In this questionnaire, we would like you to think about individuals and companies that have visited your farm (e.g. to supply or remove birds, goods or products) throughout the past year. We use the term **farm** to refer to facilities where birds or eggs are kept under a common system of management. In most situations, a farm will be a single physical location. Sometimes a farm may be made up of several distinct physical locations in close proximity, which we call **sites** (see Section 1.3).

For each **farm**, you will be asked to fill out information on:

#### Farm Demographics

1. Enterprise and farm details
2. Farm capacity and management

#### Routine Contacts

3. Transport companies
4. Feed companies
5. Live birds and hatching eggs
6. Table eggs and poultry products
7. Regular movements of personnel
8. Manure, litter, and dead birds

#### Other Information

9. Biosecurity risks
10. Additional feedback

#### How many farms are you in contact with?

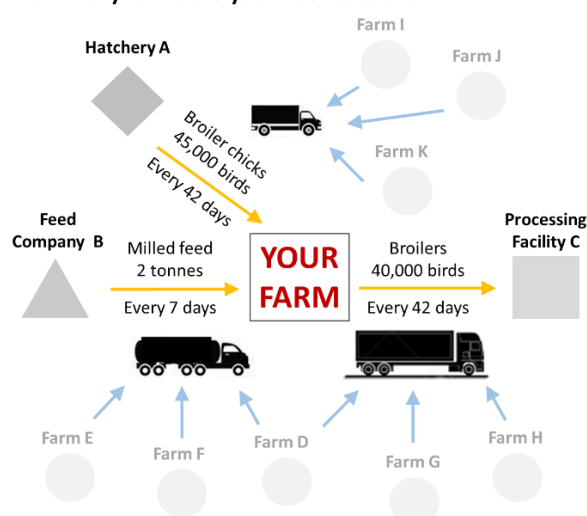

We will need to link data from all survey respondents to create the final industry contact network so it is important that you provide us with as much accurate detail as possible about the identity of individuals and companies that have visited your farm. Once the study has been completed, you will be provided with a risk map similar to the figure above showing the number of direct (yellow) and indirect (blue) connections to your farm. The identity of the indirect connections will be hidden in the figure to preserve confidentiality.

### Returning the questionnaire

Please return the questionnaire using the prepaid addressed envelope provided.

### Questions

If you have any questions or concerns about completing the questionnaire or participating in the study, please contact:

#### Carolyn Gates

Massey University  
 Institute of Veterinary, Animal and Biomedical Science (IVABS)  
 Private Bag 11-222 Palmerston North 4442  
 Tel: (06) 951 8140  
 Email: [c.gates@massey.ac.nz](mailto:c.gates@massey.ac.nz)

## 1. ENTERPRISE AND FARM DETAILS

### 1.1. Details of the person filling in this questionnaire

|          |  |
|----------|--|
| Name     |  |
| Position |  |

### 1.2. Farm contact details

|                                             |  |
|---------------------------------------------|--|
| Name                                        |  |
| Street or PO Box number                     |  |
| Town                                        |  |
| Phone (business)                            |  |
| Phone (home)                                |  |
| Phone (mobile)                              |  |
| Facsimile                                   |  |
| Email                                       |  |
| Parent company (if applicable) <sup>a</sup> |  |

<sup>a</sup> A parent company refers to the organisation that owns birds that are raised on one or more farms. Tegel Foods Limited, for example, would be referred to as a parent company.

| 1.3. Farm location details | Address (town or city only) | Agribase <sup>b</sup><br>(if present) | Farms Online ID <sup>c</sup><br>(if present) |
|----------------------------|-----------------------------|---------------------------------------|----------------------------------------------|
| Main site (1)              |                             |                                       |                                              |
| Other site (2)             |                             |                                       |                                              |
| Other site (3)             |                             |                                       |                                              |
| Other site (4)             |                             |                                       |                                              |
| Other site (5)             |                             |                                       |                                              |

<sup>b,c</sup> We will only use this information to determine the spatial location of your farm so that we can report how many other commercial farms are in close proximity.

### 1.4. What type(s) of commercial poultry operation do you run on the farm?

If more than one type of commercial poultry operation is present, please indicate approximately what % each contributes to your total farm production.

|                                                                                          | Present?<br>(check all that apply) | % of total farm production |
|------------------------------------------------------------------------------------------|------------------------------------|----------------------------|
| Commercial - Breeder                                                                     | <input type="checkbox"/>           |                            |
| Commercial - Layer hens                                                                  | <input type="checkbox"/>           |                            |
| Commercial - Pullets                                                                     | <input type="checkbox"/>           |                            |
| Commercial - Broilers                                                                    | <input type="checkbox"/>           |                            |
| Commercial - Turkeys                                                                     | <input type="checkbox"/>           |                            |
| Commercial - Hatchery                                                                    | <input type="checkbox"/>           |                            |
| Commercial - Ducks                                                                       | <input type="checkbox"/>           |                            |
|                                                                                          | Total                              | 100%                       |
| Other (e.g. emu, ostrich, aviary birds)– please specify types and numbers of such birds. |                                    |                            |

## 2. FARM CAPACITY AND MANAGEMENT

### 2.1. Over the past year, on average, how many live birds (or fertile eggs for hatcheries) were typically housed on the farm at any given time?

Please also indicate (a) the total number of sheds in which these birds were housed, (b) the average number of birds per shed, and (c) the total combined housing capacity of all sheds present on the farm.

| Species                                  | Approximate number of live birds (or fertile eggs) | (a) Total number of sheds | (b) Average shed capacity | (c) Total farm capacity |
|------------------------------------------|----------------------------------------------------|---------------------------|---------------------------|-------------------------|
| Layers                                   |                                                    |                           |                           |                         |
| Pullets                                  |                                                    |                           |                           |                         |
| Hatchery only (give fertile egg numbers) |                                                    |                           |                           |                         |
| Broilers (when birds present)            |                                                    |                           |                           |                         |
| Turkeys                                  |                                                    |                           |                           |                         |
| Ducks                                    |                                                    |                           |                           |                         |

### 2.2. How would you describe the typical flow of live birds (or fertile eggs for hatcheries) on and off farm?

Please indicate (a) if the management for the poultry species is all-in-all-out OR if multiple age classes are present at the same time, (b) the average length of the production cycle (#) specifying the **time units** in days, weeks, or months (i.e. 42 days), and (c) the average time that sheds are left empty before new birds (or fertile eggs) are introduced (#) specifying the **time units** in days, weeks, or months (i.e. 1 week).

| Species                                  | (a) Flow of birds (choose one) |                          | (b) Length of production cycle |            | (c) Downtime between cycles |            |
|------------------------------------------|--------------------------------|--------------------------|--------------------------------|------------|-----------------------------|------------|
|                                          | All-in-all-out                 | Multiple age classes     | #                              | Time units | #                           | Time units |
| Layers                                   | <input type="checkbox"/>       | <input type="checkbox"/> |                                |            |                             |            |
| Pullets                                  | <input type="checkbox"/>       | <input type="checkbox"/> |                                |            |                             |            |
| Hatchery only (give fertile egg numbers) | <input type="checkbox"/>       | <input type="checkbox"/> |                                |            |                             |            |
| Broilers                                 | <input type="checkbox"/>       | <input type="checkbox"/> |                                |            |                             |            |
| Turkeys                                  | <input type="checkbox"/>       | <input type="checkbox"/> |                                |            |                             |            |
| Ducks                                    | <input type="checkbox"/>       | <input type="checkbox"/> |                                |            |                             |            |

### 2.3. Which of the following best describes your (a) current housing type and (b) intended housing type to comply with regulatory changes by 2022.

|                                       | (a) Current              | (b) Future               |
|---------------------------------------|--------------------------|--------------------------|
| Free range housing                    | <input type="checkbox"/> | <input type="checkbox"/> |
| Colony housing                        | <input type="checkbox"/> | <input type="checkbox"/> |
| Barn housing                          | <input type="checkbox"/> | <input type="checkbox"/> |
| I do not intend to produce after 2022 |                          | <input type="checkbox"/> |

### 3. TRANSPORT COMPANIES

In this question, we are interested in knowing which transport companies and/or individuals have conveyed poultry or poultry related products (including eggs, feed, manure and dead birds) onto or off your farm during the past year.

For movements ONTO and OFF farm, please indicate the town or city of origin for the transporter (i.e. if Company A transported poultry from your farm to a processing plant and the company's depot was in Wanganui, list Wanganui as the address of origin of the transporter).

**3.1. Please list the name and location details of individuals or companies that transported poultry or poultry-related product ONTO or OFF your farm over the last 12 months (in order of importance based on frequency of contacts).** For part (d), please indicate the category number from the list below the table. For part (e), please indicate the average time interval between two consecutive contacts. For part (f), please indicate how much product is transferred with an average contact.

*Example: Transport company X from Wellington transports 3000 adult birds onto your farm once every 40 days.*

| (a) Name                            | (b) Direction of transport (select one) |                          | (c) Origin address (town or city only) | (d) Category ** | (e) Average time interval between two consecutive contacts |             | (f) How much poultry or poultry product is transferred? |              |
|-------------------------------------|-----------------------------------------|--------------------------|----------------------------------------|-----------------|------------------------------------------------------------|-------------|---------------------------------------------------------|--------------|
|                                     | Onto                                    | Off                      |                                        |                 | Time Interval                                              | Units       | Quantity                                                | Units        |
| <i>Example: Transport company X</i> | X                                       | <input type="checkbox"/> | <i>Wellington</i>                      | <i>3</i>        | <i>40</i>                                                  | <i>days</i> | <i>3000</i>                                             | <i>birds</i> |
|                                     | <input type="checkbox"/>                | <input type="checkbox"/> |                                        |                 |                                                            |             |                                                         |              |
|                                     | <input type="checkbox"/>                | <input type="checkbox"/> |                                        |                 |                                                            |             |                                                         |              |
|                                     | <input type="checkbox"/>                | <input type="checkbox"/> |                                        |                 |                                                            |             |                                                         |              |
|                                     | <input type="checkbox"/>                | <input type="checkbox"/> |                                        |                 |                                                            |             |                                                         |              |
|                                     | <input type="checkbox"/>                | <input type="checkbox"/> |                                        |                 |                                                            |             |                                                         |              |
|                                     | <input type="checkbox"/>                | <input type="checkbox"/> |                                        |                 |                                                            |             |                                                         |              |
|                                     | <input type="checkbox"/>                | <input type="checkbox"/> |                                        |                 |                                                            |             |                                                         |              |
|                                     | <input type="checkbox"/>                | <input type="checkbox"/> |                                        |                 |                                                            |             |                                                         |              |
|                                     | <input type="checkbox"/>                | <input type="checkbox"/> |                                        |                 |                                                            |             |                                                         |              |
|                                     | <input type="checkbox"/>                | <input type="checkbox"/> |                                        |                 |                                                            |             |                                                         |              |
|                                     | <input type="checkbox"/>                | <input type="checkbox"/> |                                        |                 |                                                            |             |                                                         |              |

**\*\* Categories include those who transport:**

(1) Feed.

(3) Day old chicks, pullets, and adult birds.

(5) Poultry product.

(7) Dead birds.

(2) Hatching eggs.

(4) Table eggs.

(6) Manure and litter.

(8) Broilers for slaughter

#### 4. FEED COMPANIES

In this question, we are interested in the origin of feed that is used on your farm and the destination of feed that might be sent from your farm to another location. In the majority of cases, there will only be a one-way flow of feed onto a farm. However, if feed is ever sold onwards or returned to a distributor, we would also like to know.

In each case, please indicate the town or city of origin (or destination) of the feed. For example, if you purchased feed from Company B whose depot was in Napier, give Napier as the address of the feed supplier.

**4.1. Please list the name and location details of individuals or companies that moved feed ONTO your farm or received feed moved OFF your farm over the last 12 months (in order of importance based on frequency of contacts).** For part (d), please indicate the category number from the list below the table. For part (e), please indicate the average time interval between two consecutive contacts. For part (f), please indicate how much product is transferred with an average contact.

*Example: Feed company A from Nelson moves 20 tonnes of bagged feed onto your farm every 25 days.*

| (a) Name                       | (b) Direction of transport (select one) |                          | (c) Origin or destination address (town or city only) | (d) Category ** | (e) Average time interval between two consecutive contacts |             | (f) How much poultry or poultry product is transferred? |               |
|--------------------------------|-----------------------------------------|--------------------------|-------------------------------------------------------|-----------------|------------------------------------------------------------|-------------|---------------------------------------------------------|---------------|
|                                | Onto                                    | Off                      |                                                       |                 | Time interval                                              | Units       | Quantity                                                | Units         |
| <i>Example: Feed company A</i> | X                                       | <input type="checkbox"/> | <i>Nelson</i>                                         | <i>2</i>        | <i>25</i>                                                  | <i>days</i> | <i>20</i>                                               | <i>tonnes</i> |
|                                | <input type="checkbox"/>                | <input type="checkbox"/> |                                                       |                 |                                                            |             |                                                         |               |
|                                | <input type="checkbox"/>                | <input type="checkbox"/> |                                                       |                 |                                                            |             |                                                         |               |
|                                | <input type="checkbox"/>                | <input type="checkbox"/> |                                                       |                 |                                                            |             |                                                         |               |
|                                | <input type="checkbox"/>                | <input type="checkbox"/> |                                                       |                 |                                                            |             |                                                         |               |
|                                | <input type="checkbox"/>                | <input type="checkbox"/> |                                                       |                 |                                                            |             |                                                         |               |
|                                | <input type="checkbox"/>                | <input type="checkbox"/> |                                                       |                 |                                                            |             |                                                         |               |
|                                | <input type="checkbox"/>                | <input type="checkbox"/> |                                                       |                 |                                                            |             |                                                         |               |
|                                | <input type="checkbox"/>                | <input type="checkbox"/> |                                                       |                 |                                                            |             |                                                         |               |
|                                | <input type="checkbox"/>                | <input type="checkbox"/> |                                                       |                 |                                                            |             |                                                         |               |
|                                | <input type="checkbox"/>                | <input type="checkbox"/> |                                                       |                 |                                                            |             |                                                         |               |
|                                | <input type="checkbox"/>                | <input type="checkbox"/> |                                                       |                 |                                                            |             |                                                         |               |

**\*\* Categories include:**

(1) Milled feed.

(3) Home mix.

(5) Others

(2) Bagged feed.

(4) Combination of bought in and home mixed feed.

## 5. LIVE BIRDS AND HATCHING EGGS

In this question we are interested in the origin of live birds (including day-old chicks and point-of-lay pullets) and/or hatching eggs that came onto your farm and the destination of live birds (including broilers for processing, end-of-lay birds) and/or hatching eggs were sent from your farm to another location.

**5.1. Please list the name and location details of individuals or companies that moved live birds and/or hatching eggs ONTO your farm or received live birds and/or hatching eggs moved OFF your farm over the last 12 months (in order of importance based on frequency of contacts).** For part (d), please indicate the category number from the list below the table. For part (e), please indicate the average time interval between two consecutive contacts. For part (f), please indicate how much product is transferred with an average contact.

*Example: 2500 adult broilers birds are moved to Processor Z in Hamilton from your farm every 42 days.*

| (a) Name                    | (b) Direction of transport<br>(select one) |                                     | (c) Origin or destination<br>address (town or city only) | (d) Category<br>** | (e) Average time interval<br>between two consecutive<br>contacts |             | (f) How much poultry or<br>poultry product is<br>transferred? |              |
|-----------------------------|--------------------------------------------|-------------------------------------|----------------------------------------------------------|--------------------|------------------------------------------------------------------|-------------|---------------------------------------------------------------|--------------|
|                             | Onto                                       | Off                                 |                                                          |                    | Time interval                                                    | Units       | Quantity                                                      | Units        |
| <i>Example: Processor Z</i> | <input type="checkbox"/>                   | <input checked="" type="checkbox"/> | <i>Hamilton</i>                                          | <i>4</i>           | <i>42</i>                                                        | <i>days</i> | <i>2500</i>                                                   | <i>birds</i> |
|                             | <input type="checkbox"/>                   | <input type="checkbox"/>            |                                                          |                    |                                                                  |             |                                                               |              |
|                             | <input type="checkbox"/>                   | <input type="checkbox"/>            |                                                          |                    |                                                                  |             |                                                               |              |
|                             | <input type="checkbox"/>                   | <input type="checkbox"/>            |                                                          |                    |                                                                  |             |                                                               |              |
|                             | <input type="checkbox"/>                   | <input type="checkbox"/>            |                                                          |                    |                                                                  |             |                                                               |              |
|                             | <input type="checkbox"/>                   | <input type="checkbox"/>            |                                                          |                    |                                                                  |             |                                                               |              |
|                             | <input type="checkbox"/>                   | <input type="checkbox"/>            |                                                          |                    |                                                                  |             |                                                               |              |
|                             | <input type="checkbox"/>                   | <input type="checkbox"/>            |                                                          |                    |                                                                  |             |                                                               |              |
|                             | <input type="checkbox"/>                   | <input type="checkbox"/>            |                                                          |                    |                                                                  |             |                                                               |              |
|                             | <input type="checkbox"/>                   | <input type="checkbox"/>            |                                                          |                    |                                                                  |             |                                                               |              |
|                             | <input type="checkbox"/>                   | <input type="checkbox"/>            |                                                          |                    |                                                                  |             |                                                               |              |
|                             | <input type="checkbox"/>                   | <input type="checkbox"/>            |                                                          |                    |                                                                  |             |                                                               |              |

**\*\* Categories include:**

(1) Hatching eggs.

(2) Day old chicks.

(3) Pullets.

(4) Adult birds.

## 6. TABLE EGGS AND POULTRY PRODUCTS

In this question we are interested in the origin of table eggs and/or poultry product (e.g. dressed chickens) that came onto your farm and the destination of table eggs and/or poultry product that was sent from your farm to another location.

**6.1. Please list the name and location details of individuals or companies that moved table eggs and/or poultry products ONTO your farm or received table eggs and/or poultry products moved OFF your farm over the last 12 months (in order of importance based on frequency of contacts).** For part (d), please indicate the category number from the list below the table. For part (e), please indicate the average time interval between two consecutive contacts. For part (f), please indicate how much product is transferred with an average contact.

*Example: 10 kg of poultry feathers are moved to Processor ABC in Wellington from your farm every 3 months.*

| (a) Name                      | (b) Direction of transport (select one) |                          | (c) Origin or destination address (town or city only) | (d) Category ** | (e) Average time interval between two consecutive contacts |               | (f) How much poultry or poultry product is transferred? |           |
|-------------------------------|-----------------------------------------|--------------------------|-------------------------------------------------------|-----------------|------------------------------------------------------------|---------------|---------------------------------------------------------|-----------|
|                               | Onto                                    | Off                      |                                                       |                 | Time interval                                              | Units         | Quantity                                                | Units     |
| <i>Example: Processor ABC</i> | <input type="checkbox"/>                | X                        | <i>Wellington</i>                                     | <i>3</i>        | <i>3</i>                                                   | <i>months</i> | <i>10</i>                                               | <i>kg</i> |
|                               | <input type="checkbox"/>                | <input type="checkbox"/> |                                                       |                 |                                                            |               |                                                         |           |
|                               | <input type="checkbox"/>                | <input type="checkbox"/> |                                                       |                 |                                                            |               |                                                         |           |
|                               | <input type="checkbox"/>                | <input type="checkbox"/> |                                                       |                 |                                                            |               |                                                         |           |
|                               | <input type="checkbox"/>                | <input type="checkbox"/> |                                                       |                 |                                                            |               |                                                         |           |
|                               | <input type="checkbox"/>                | <input type="checkbox"/> |                                                       |                 |                                                            |               |                                                         |           |
|                               | <input type="checkbox"/>                | <input type="checkbox"/> |                                                       |                 |                                                            |               |                                                         |           |
|                               | <input type="checkbox"/>                | <input type="checkbox"/> |                                                       |                 |                                                            |               |                                                         |           |
|                               | <input type="checkbox"/>                | <input type="checkbox"/> |                                                       |                 |                                                            |               |                                                         |           |
|                               | <input type="checkbox"/>                | <input type="checkbox"/> |                                                       |                 |                                                            |               |                                                         |           |
|                               | <input type="checkbox"/>                | <input type="checkbox"/> |                                                       |                 |                                                            |               |                                                         |           |
|                               | <input type="checkbox"/>                | <input type="checkbox"/> |                                                       |                 |                                                            |               |                                                         |           |

**\*\* Categories include:**

(1) Table eggs.

(2) Poultry product.

(3) Feathers and/or offal

## 7. REGULAR MOVEMENTS OF PERSONNEL

In this question, we are interested in the movement of people associated with the poultry industry onto your farm and the destination of permanent members of your farm staff to other locations where poultry are present. We are not interested in details of every single movement, only those that occur on a regular basis (e.g. routine visits by advisors, contractors, and personnel from other premises where poultry are kept).

**7.1. Please list the name and location details of those permanent staff members who made an ON FARM or OFF FARM visit to other locations where poultry were present over the last 12 months (in order of importance).** For part (a), please indicate the category number from the list below the table. For part (c), please indicate the average time interval between two consecutive contacts.

*Example: A veterinarian based in Tauranga visits your farm for regular health inspections once every month.*

| (a) Category**    | (b) Origin or destination address<br>(town or city only) | (c) Average time interval between two consecutive contacts |              |
|-------------------|----------------------------------------------------------|------------------------------------------------------------|--------------|
|                   |                                                          | Time interval                                              | Units        |
| <i>Example: 1</i> | <i>Tauranga</i>                                          | <i>1</i>                                                   | <i>month</i> |
|                   |                                                          |                                                            |              |
|                   |                                                          |                                                            |              |
|                   |                                                          |                                                            |              |
|                   |                                                          |                                                            |              |
|                   |                                                          |                                                            |              |
|                   |                                                          |                                                            |              |
|                   |                                                          |                                                            |              |
|                   |                                                          |                                                            |              |
|                   |                                                          |                                                            |              |

**\*\* Categories include:**

- |                                                                                                                    |                                                                  |                                                                      |
|--------------------------------------------------------------------------------------------------------------------|------------------------------------------------------------------|----------------------------------------------------------------------|
| (1) Veterinarians, advisors, industry representatives.                                                             | (3) Permanent employees on your farm                             | (5) Individuals from premises where non-commercial poultry are kept. |
| (2) Contractors (those having direct contact with poultry sheds or equipment e.g. cleaning and maintenance crews). | (4) Individuals from premises where commercial poultry are kept. |                                                                      |

## 8. NEW LITTER, MANURE/USED LITTER, AND DEAD BIRDS

In this question, we would like to know about the movement of manure/used litter, and dead birds to and from your farm. In the majority of cases, there will be a one-way flow of manure/used litter and dead birds off the farm, but there may also include the movement of new litter to the farm. We use the term “dead birds” here to refer to those birds that have died on site.

**8.1. Please list the name and location details of individuals or companies that moved new litter, manure/used litter, or dead birds ONTO your farm or new litter, manure/used litter, or dead birds moved OFF your farm over the last 12 months (in order of importance).** For part (d), please indicate the category number from the list below the table. For part (e), please indicate the average time interval between two consecutive contacts. For part (f), please indicate how much product is transferred with an average contact.

*Example: 100 kgs of manure are moved to Company ABC of Napier from your farm every 45 days.*

| (a) Name                    | (b) Direction of transport (select one) |                                     | (c) Origin or destination address (town or city only) | (d) Category ** | (e) Average time interval between two consecutive contacts |             | (f) How much product is transferred? |           |
|-----------------------------|-----------------------------------------|-------------------------------------|-------------------------------------------------------|-----------------|------------------------------------------------------------|-------------|--------------------------------------|-----------|
|                             | Onto                                    | Off                                 |                                                       |                 | Time gap                                                   | Units       | Quantity                             | Units     |
| <i>Example: Company ABC</i> | <input type="checkbox"/>                | <input checked="" type="checkbox"/> | <i>Napier</i>                                         | <i>2</i>        | <i>45</i>                                                  | <i>days</i> | <i>100</i>                           | <i>kg</i> |
|                             | <input type="checkbox"/>                | <input type="checkbox"/>            |                                                       |                 |                                                            |             |                                      |           |
|                             | <input type="checkbox"/>                | <input type="checkbox"/>            |                                                       |                 |                                                            |             |                                      |           |
|                             | <input type="checkbox"/>                | <input type="checkbox"/>            |                                                       |                 |                                                            |             |                                      |           |
|                             | <input type="checkbox"/>                | <input type="checkbox"/>            |                                                       |                 |                                                            |             |                                      |           |
|                             | <input type="checkbox"/>                | <input type="checkbox"/>            |                                                       |                 |                                                            |             |                                      |           |
|                             | <input type="checkbox"/>                | <input type="checkbox"/>            |                                                       |                 |                                                            |             |                                      |           |
|                             | <input type="checkbox"/>                | <input type="checkbox"/>            |                                                       |                 |                                                            |             |                                      |           |
|                             | <input type="checkbox"/>                | <input type="checkbox"/>            |                                                       |                 |                                                            |             |                                      |           |
|                             | <input type="checkbox"/>                | <input type="checkbox"/>            |                                                       |                 |                                                            |             |                                      |           |
|                             | <input type="checkbox"/>                | <input type="checkbox"/>            |                                                       |                 |                                                            |             |                                      |           |
|                             | <input type="checkbox"/>                | <input type="checkbox"/>            |                                                       |                 |                                                            |             |                                      |           |

**\*\* Categories include:**

(1) Dead birds.                      (2) Manure /used litter.                      (3) New Litter

## 9. BIOSECURITY RISKS

### 9.1. Please answer the following questions about the workers on your farm.

|                                         |                                     |                                         |
|-----------------------------------------|-------------------------------------|-----------------------------------------|
| How many full-time workers are present? |                                     |                                         |
| How many part-time workers are present? |                                     |                                         |
| Workers are assigned to (select one):   | <input type="checkbox"/> Whole farm | <input type="checkbox"/> Specific sheds |

### 9.2. Which of the following biosecurity measures are implemented on your property?

Please indicate how frequently they are implemented.

|                                                   | Never                    | Rarely                   | Sometimes                | Often                    | Always                   |
|---------------------------------------------------|--------------------------|--------------------------|--------------------------|--------------------------|--------------------------|
| Vehicle disinfection before entering farm         | <input type="checkbox"/> |
| Dedicated clean coveralls for each shed           | <input type="checkbox"/> |
| Dedicated boots or boot covers worn for each shed | <input type="checkbox"/> |
| Footbaths at shed entrances                       | <input type="checkbox"/> |
| Monitored rat and mouse bait stations             | <input type="checkbox"/> |
| Bird-proofed housing                              | <input type="checkbox"/> |
| Bird-proofed feed storage                         | <input type="checkbox"/> |

### 9.3. Which of the following equipment is shared with other farms?

Choose all that apply. For part (b), please indicate whether the shared equipment is cleaned and disinfected between farms.

|                                                                   | (a)<br>Equipment         | (b) Is the equipment<br>cleaned and<br>disinfected between<br>farms? |
|-------------------------------------------------------------------|--------------------------|----------------------------------------------------------------------|
| Vehicles and trailers                                             | <input type="checkbox"/> | <input type="checkbox"/> No <input type="checkbox"/> Yes             |
| Gates and panels                                                  | <input type="checkbox"/> | <input type="checkbox"/> No <input type="checkbox"/> Yes             |
| Lawn mowers                                                       | <input type="checkbox"/> | <input type="checkbox"/> No <input type="checkbox"/> Yes             |
| Pressure sprayers / washers                                       | <input type="checkbox"/> | <input type="checkbox"/> No <input type="checkbox"/> Yes             |
| Skid steer loaders (tractors with buckets for cleaning out sheds) | <input type="checkbox"/> | <input type="checkbox"/> No <input type="checkbox"/> Yes             |
| Other equipment                                                   | <input type="checkbox"/> | <input type="checkbox"/> No <input type="checkbox"/> Yes             |

### 9.4. Please answer the following questions about the water supply on your farm.

Select ONE option for each question

|                                                                     |                                                                                                                                                                               |
|---------------------------------------------------------------------|-------------------------------------------------------------------------------------------------------------------------------------------------------------------------------|
| What is the main source of drinking water for poultry on your farm? | <input type="checkbox"/> Town supply<br><input type="checkbox"/> River<br><input type="checkbox"/> Bore<br><input type="checkbox"/> Other, please specify:                    |
| How is the drinking water treated?                                  | <input type="checkbox"/> No treatment<br><input type="checkbox"/> Chlorine dioxide<br><input type="checkbox"/> Ultraviolet<br><input type="checkbox"/> Other, please specify: |

**9.5. Please answer the following questions about litter management on your farm.**

|                                      |                                                                                                        |                                               |
|--------------------------------------|--------------------------------------------------------------------------------------------------------|-----------------------------------------------|
| What type of litter do you use?      |                                                                                                        |                                               |
| Is a litter shed present?            | <input type="checkbox"/> No                                                                            | <input type="checkbox"/> Yes                  |
| How often are the sheds cleaned out? | <input type="checkbox"/> Partially after each run                                                      | <input type="checkbox"/> Fully after each run |
| What disinfectant do you use?        |                                                                                                        |                                               |
| How moist is the litter?             | <input type="checkbox"/> Too dry <input type="checkbox"/> About right <input type="checkbox"/> Too wet |                                               |
| Do you use litter treatment?         | <input type="checkbox"/> No <input type="checkbox"/> Yes, please specify:                              |                                               |

**9.6. Do you see wild birds or waterfowl (a) in the same area as poultry (e.g. within sheds or within ranges on free-range operations) or (b) on any ponds or waterways present on the farm? If you do have ponds or waterways on the farm, (c) what is the approximate distance of the ponds or waterways from the poultry sheds?**

|            | (a) In the same area as poultry?                         | (b) On ponds or waterways on the farm?                                                | (c) Approximate distance of pond or waterway from sheds (metres) |
|------------|----------------------------------------------------------|---------------------------------------------------------------------------------------|------------------------------------------------------------------|
| Wild birds | <input type="checkbox"/> No <input type="checkbox"/> Yes | <input type="checkbox"/> No <input type="checkbox"/> Yes <input type="checkbox"/> NA* |                                                                  |
| Waterfowl  | <input type="checkbox"/> No <input type="checkbox"/> Yes | <input type="checkbox"/> No <input type="checkbox"/> Yes <input type="checkbox"/> NA* |                                                                  |

\* I do not have any ponds or waterways present on the farm.

**If you answered yes to question (a) and/or (b), please indicate which of the following wild bird or waterfowl species are observed:**

|                          | (a)                      | (b)                      |
|--------------------------|--------------------------|--------------------------|
| Sparrow                  | <input type="checkbox"/> | <input type="checkbox"/> |
| Starling                 | <input type="checkbox"/> | <input type="checkbox"/> |
| Sea gull                 | <input type="checkbox"/> | <input type="checkbox"/> |
| Duck                     | <input type="checkbox"/> | <input type="checkbox"/> |
| Others (please specify): | <input type="checkbox"/> | <input type="checkbox"/> |
|                          |                          |                          |

**9.7. Please answer the following questions about contact with backyard (non-commercial) poultry operations.**

|                                                                                                     | No                       | Yes                        | NA                       |
|-----------------------------------------------------------------------------------------------------|--------------------------|----------------------------|--------------------------|
| Do <b>point-of-lay</b> birds get sold directly to backyard flocks from your farm?                   | <input type="checkbox"/> | <input type="checkbox"/> * | <input type="checkbox"/> |
| Do <b>end-of-lay</b> birds get sold directly to backyard flocks from your farm?                     | <input type="checkbox"/> | <input type="checkbox"/> * | <input type="checkbox"/> |
| How many independently-owned backyard flocks are adjacent to your farm (i.e share a farm boundary)? |                          |                            |                          |

**\* If you answered yes to either of these questions, would you mind telling us how these birds are advertised for sale?**

---



---



---



---

**10. ADDITIONAL FEEDBACK****10.1. How concerned are you about the following poultry health issues on your farm?**

|                       | Not at all concerned     | Slightly concerned       | Somewhat concerned       | Moderately concerned     | Extremely concerned      |
|-----------------------|--------------------------|--------------------------|--------------------------|--------------------------|--------------------------|
| Campylobacter         | <input type="checkbox"/> |
| Salmonella            | <input type="checkbox"/> |
| Avian influenza       | <input type="checkbox"/> |
| Coccidiosis           | <input type="checkbox"/> |
| Antibiotic resistance | <input type="checkbox"/> |
| Welfare               | <input type="checkbox"/> |

Comments:

---



---



---



---

**10.2. What would you describe as the biggest concern facing your farm?**


---



---



---



---



---

**10.3. What areas of future research would have the most benefit to your farm?**


---



---



---



---



---

**10.4. Would you be willing to participate in follow-up surveys?**

|     |                          |
|-----|--------------------------|
| Yes | <input type="checkbox"/> |
| No  | <input type="checkbox"/> |

**Thank You!**

We greatly appreciate your time in filling out this survey.

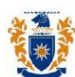**Massey University**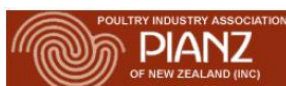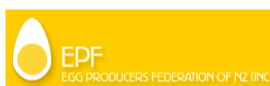Ministry for Primary Industries  
Manatū Ahu Matua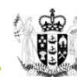

Supplement: Supplementary file 1 [file 1 › tnzv_a_1746208_sm4331.pdf]
