# Supplementary material
Source: publisher figshare collection journal article supplement (https://tandf.figshare.com/articles/dataset/_/12032757)
Supplement: Supplementary file 1 [file 1]

Archive with 3 entries (3 files):
- tnzv_a_1746208_sm4331.pdf
- tnzv_a_1746208_sm4327.pdf
- tnzv_a_1746208_sm4326.pdf
